# Supplementary material
Source: PubMed Central journal article supplement (PMC9106093)
Supplement: NIHMS1712452-supplement-Supplementary_Material.pdf [file NIHMS1712452-supplement-Supplementary_Material.pdf]

---

**Supplementary information**

---

**Human biomimetic liver microphysiology systems in drug development and precision medicine**

---

In the format provided by the authors and unedited

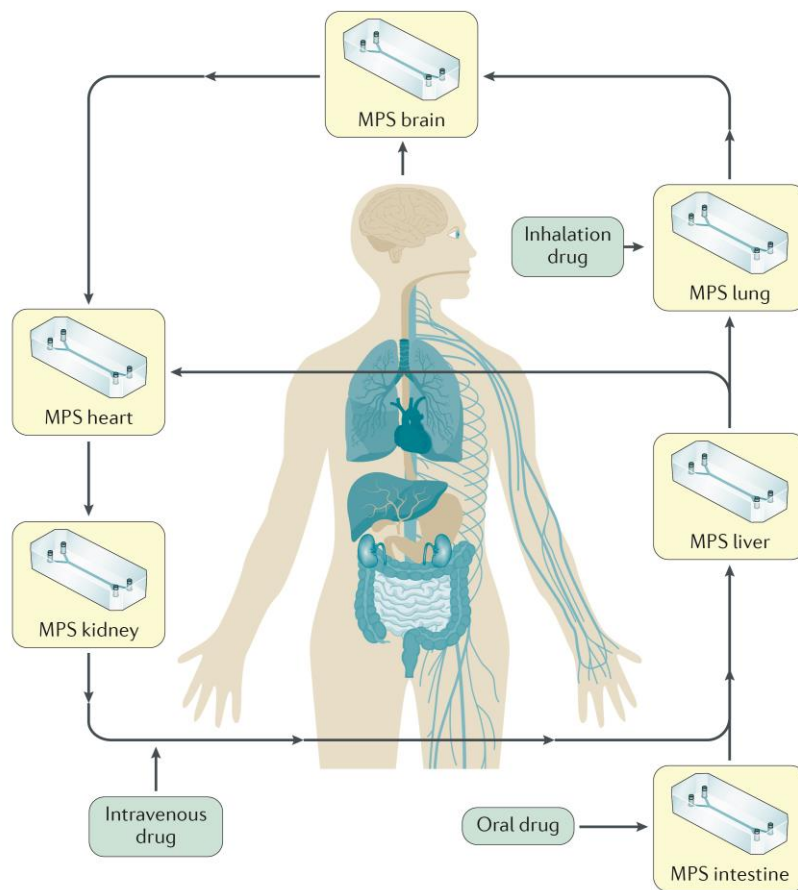

**Supplementary Figure 1. Example of a multi-organ MPS.** All integrated multi-organ systems would adhere to known human physiology. In this example, 4 elimination organs (intestine, liver, kidney and lung); 2 barrier layers (intestine, blood brain barrier) and the heart are coupled. 3-drug insertion points are illustrated which demonstrate how this configuration could be used for ADMET. A similar configuration using organ MPS for intestine, liver, pancreas and white adipose tissue would be an integrated multi-organ platform to study complex liver diseases such as NAFLD/NASH and T2DM.

**Supplementary Table 1. Heat Map of the Comparative and Complementary Characteristics of Human Liver Epithelial Organoids, Current human biomimetic-MPS (HBL-MPS), and Next Generation Structured-MPS and Organoid-MPS (Green indicates ability to fulfill the objective and red indicates that the objective cannot be met).**

| Characteristics                                           | Epithelial Organoids | Current HBL-MPS | Next Generation: Structured-MPS & Organoid MPS-MPS |
|-----------------------------------------------------------|----------------------|-----------------|----------------------------------------------------|
| <b>Data Acquisition</b>                                   |                      |                 |                                                    |
| Real-Time Imaging Metrics                                 | Partial              | Included        | Included                                           |
| In-Line Sensors of Functions                              | Missing              | Included        | Included                                           |
| Temporal and Spatial Content of Read-outs                 | Missing              | Included        | Included                                           |
| <b>Controlling the microphysiological state</b>           |                      |                 |                                                    |
| Fluidic and Mechanical Cues                               | Missing              | Included        | Included                                           |
| Access to Microbiome                                      | Missing              | Included        | Included                                           |
| Control of Microenvironment (e.g. Zonation, Matrix)       | Partial              | Included        | Included                                           |
| Control of Immune Cell Infiltration                       | Missing              | Included        | Included                                           |
| Genetic Control of Cell state                             | Partial              | Missing         | Included                                           |
| <b>Cell types and non-epithelial components</b>           |                      |                 |                                                    |
| Use of Stem Cells                                         | Included             | Partial         | Included                                           |
| Renewable cell types                                      | Included             | Missing         | Included                                           |
| Presence of native Cell Types                             | Partial              | Included        | Included                                           |
| Innervation                                               | Missing              | Missing         | Missing                                            |
| Vascularization                                           | Partial              | Included        | Included                                           |
| Extent of Recapitulating Human Liver Acinus Structure     | Missing              | Included        | Included                                           |
| <b>Throughput and heterogeneity</b>                       |                      |                 |                                                    |
| Homogeneity of individual models                          | Missing              | Included        | Included                                           |
| Ease of Production                                        | Partial              | Missing         | Missing                                            |
| Throughput of studies                                     | Included             | Missing         | Missing                                            |
| Breadth of Applications in Biomedicine                    | Partial              | Partial         | Included                                           |
| Key to Characteristics: ■-Missing, ■-Partial, ■- Included |                      |                 |                                                    |

**Supplementary Table 2. Required Functions of Adult, PSC-derived Liver Tissue in HBL-MPS for Physiological & Clinically Relevant Applications.**<sup>1-5</sup>

| Functional characteristics                                           | Description                                                                                                                                                                                                                                  |
|----------------------------------------------------------------------|----------------------------------------------------------------------------------------------------------------------------------------------------------------------------------------------------------------------------------------------|
| Active transport proteins                                            | NTCP, OATPs, OAT, OCTs, MDR, BSEP, BCR, MRPs                                                                                                                                                                                                 |
| Expression and activity of clinically relevant enzymes               | UGT1A1, G-6-Pase, A1AT, OTC, (ATP7B) copper-transporting ATPase 2, (PAH gene) enzyme phenylalanine hydroxylase, branched-chain alpha-keto acid dehydrogenase complex (BCKDC), FAH                                                            |
| Drug Metabolism (Cytochrome activity)                                | (CYP450) CYP1A2, CYP2A6, CYP2B6, CYP2C8, CYP2C9, CYP2C19, CYP2D6, CYP3A4, CYP7A1                                                                                                                                                             |
| Expression and activity of xenosensors                               | Ahr, PXR, CAR, XRE,                                                                                                                                                                                                                          |
| Expression and transcription of liver specific transcription factors | HNF4a (adult isoform), CEBPa, CEBPb, HNF1a,                                                                                                                                                                                                  |
| Hepatic synthetic functions                                          | Secretion of albumin, A1AT, fibronectin, apoproteins, transthyretin, complement factors, coagulation factors (II, V, VII, IX, X), synthesis of Urea,                                                                                         |
| Other important metabolic function                                   | Synthesis of cholic acid and chenodeoxycholic acid, Formation of 7 $\alpha$ -hydroxycholesterol,                                                                                                                                             |
| Absence of markers associated with fetal stage                       | LGR5, OCT4, CD133, AFP, CYP3A7                                                                                                                                                                                                               |
| Morphological features of liver cellular complexity                  | Liver tissue tight junctions (Claudin-1, 10, occluding, ZO1), liver specific gap junctions (e.g. Cx32, Cx26, Cx43)                                                                                                                           |
| Bile duct (cholangiocytes) functions                                 | Transport functions, CFTR (Cl <sup>-</sup> secretion), ASBT (bile acid absorption), SGLT1 (glucose and amino acids absorption), AQP1 (water channel), secretin-induced release of bicarbonate, AE2 (Cl <sup>-</sup> / bicarbonate exchanger) |
| Liver sinusoidal endothelial cell system functions <sup>215</sup>    | CD4, CD32, ICAM1, Fenestrae, blood flow regulation, permeable barrier of different molecules, endocytosis, immune modulators                                                                                                                 |
| Functions of liver sinusoids                                         | oxygen and biochemical zonation                                                                                                                                                                                                              |

**Supplemental Table 3: Example phenotypic, functional and genomic metrics of biomimetic MPS for liver metabolic syndrome disease models**

| Readout                                                                                                                                                                                                   | MPS Live Measurements                             | Clinical Relevance                                                                                 |
|-----------------------------------------------------------------------------------------------------------------------------------------------------------------------------------------------------------|---------------------------------------------------|----------------------------------------------------------------------------------------------------|
| <b>Secretome</b>                                                                                                                                                                                          |                                                   |                                                                                                    |
| Albumin secretion                                                                                                                                                                                         | ELISA <sup>7</sup>                                | Metabolic competence, overall hepatocyte function                                                  |
| Urea secretion                                                                                                                                                                                            | Colorimetric <sup>7</sup>                         | Metabolic competence, overall hepatocyte function                                                  |
| LDH release <sup>+</sup>                                                                                                                                                                                  | Colorimetric <sup>7</sup>                         | Hepatocellular injury corresponding with ALT and AST                                               |
| Glucose secretion                                                                                                                                                                                         | AmplexRed Glucose Assay <sup>8</sup>              | Glucose regulation                                                                                 |
| $\beta$ -hydroxybutyrate                                                                                                                                                                                  | Colorimetric <sup>9</sup>                         | Fatty acid oxidation                                                                               |
| Lactate secretion                                                                                                                                                                                         | Colorimetric <sup>10</sup>                        | Glycolysis                                                                                         |
| Cytokine release                                                                                                                                                                                          | Human Cytokine Panel <sup>11</sup>                | Liver stress/injury response                                                                       |
| Fatty acid secretion                                                                                                                                                                                      | Mass spectroscopy <sup>12</sup>                   | Fatty acid metabolism                                                                              |
| TNF $\alpha$ secretion                                                                                                                                                                                    | ELISA <sup>7</sup>                                | Kupffer activation, innate inflammatory response                                                   |
| Bile acids (BA)                                                                                                                                                                                           | BA profile by Mass spectroscopy <sup>13</sup>     | NAFLD, NASH altered plasma BA profile corresponds                                                  |
| Exosomes (proteins/RNA/microRNA)                                                                                                                                                                          | antibody ( $\alpha$ -SK1), qRT-PCR <sup>14</sup>  | Circulating extracellular vesicles containing SK1, miRNA-122 & -21 as markers for NAFLD, NASH, HCC |
| <b>Biosensors</b>                                                                                                                                                                                         |                                                   |                                                                                                    |
| Hepatocyte Apoptosis                                                                                                                                                                                      | Biosensor <sup>7,15</sup>                         | Hepatocellular injury/death                                                                        |
| ROS (Hepatocytes & Kupffer)                                                                                                                                                                               | Biosensor <sup>7,15</sup>                         | Hepatocellular injury, Kupffer cell activation                                                     |
| DAG (Hepatocytes)                                                                                                                                                                                         | Biosensor <sup>16</sup>                           | Insulin resistance marker                                                                          |
| ER stress/UPR Hepatocytes                                                                                                                                                                                 | Biosensor <sup>16</sup>                           | Hepatocellular damage                                                                              |
| Insulin resistance (Hepatocytes)                                                                                                                                                                          | Biosensor <sup>17,18</sup>                        | Lost suppression of glucose production                                                             |
| Cell Tracking (stellate & Kupffer)                                                                                                                                                                        | Biosensor <sup>15</sup>                           | Morphology of early liver injury, proliferation                                                    |
| JNK activity                                                                                                                                                                                              | Biosensor <sup>19</sup>                           | Contributes to inflammation, fibrosis, cancer growth, and metabolic diseases of the liver          |
| <b>Imaging Measures</b>                                                                                                                                                                                   |                                                   |                                                                                                    |
| Steatosis                                                                                                                                                                                                 | Brightfield & LipidTox <sup>20</sup>              | Normal and/or pathological fat storage in hepatocytes                                              |
| PMN Infiltration                                                                                                                                                                                          | Imaging labeled PMNs <sup>21</sup>                | Adaptive inflammatory response                                                                     |
| Mitochondrial Function                                                                                                                                                                                    | TMRE <sup>20</sup>                                | Hepatocellular health and function                                                                 |
| Glucose Uptake                                                                                                                                                                                            | 6-NBDG <sup>22</sup>                              | Hepatocellular insulin resistance marker                                                           |
| <b>Endpoint Measurements</b>                                                                                                                                                                              |                                                   |                                                                                                    |
| Glycogen                                                                                                                                                                                                  | Antibody <sup>23</sup> or PAS stain <sup>24</sup> | Glucose regulation                                                                                 |
| Hepatocyte Ballooning                                                                                                                                                                                     | Cytokeratin, anti-CK8/18                          | A key indication of NASH <sup>25</sup>                                                             |
| LSEC Activation                                                                                                                                                                                           | ICAM antibody – IF <sup>26</sup>                  | Regulates fibrosis and inflammation responses                                                      |
| Fibrosis (Stellate Activation & Collagen Synthesis)                                                                                                                                                       | $\alpha$ -SMA, COL1A2 IF <sup>7</sup>             | Early fibrosis indicator and direct measure of fibrosis                                            |
| RNAseq                                                                                                                                                                                                    | RNA sequencing, multiple methods <sup>27</sup>    | Comparison to patient results <sup>28,29</sup>                                                     |
| *Based on known clinical data; $\alpha$ -SK1 = sphingosine kinase 1 ; $\alpha$ -SMA = alpha smooth muscle actin; COL1A2 = collagen type 1, alpha 2; 6-NBDG- fluorescent glucose probe; DAG diacylglycerol |                                                   |                                                                                                    |

**Supplementary Table 4: Examples of potential gene-based or secreted clinically relevant biomarkers in HBL-MPS<sup>30-37</sup>**

| Disease                              | Relevant genes                                                                                                                                 |                                                                                                            |               | Secreted molecule(s)                                                                                                                                                                                                                         |
|--------------------------------------|------------------------------------------------------------------------------------------------------------------------------------------------|------------------------------------------------------------------------------------------------------------|---------------|----------------------------------------------------------------------------------------------------------------------------------------------------------------------------------------------------------------------------------------------|
|                                      | Variant                                                                                                                                        | Transcription factor                                                                                       | Other         |                                                                                                                                                                                                                                              |
| <b>NAFLD (Steatosis vs NASH)</b>     | PNPLA3<br>MBOAT7<br>GCKR<br>TM6SF2<br>TCF7L2                                                                                                   | FXR<br>HNF4a<br>SREBP<br>CEBPa<br>PPARa                                                                    |               | cytokeratin 18 caspase-cleaved fragments, IL-6, adiponectin, TNFa, IL-8, pyroglutamate, Fibroblast growth factor (FGF) 21 in combination with cytokeratin 18 cleavage fragments, miR-34a, miR-122, miR-192, miR-21, miR-375, miR-16, miR-222 |
| <b>Fibrosis</b>                      | PNPLA3<br>MBOAT7<br>GCKR<br>TM6SF2<br>TCF7L2                                                                                                   | SMAD3<br>STAT3<br>YAP1<br>GLI2<br>AP-1<br>SOX9<br>MRTF-A                                                   | MMPs<br>TIMPs | Procollagen Type III (PIIINP), precursor C3-protein (PRO-C3), hyaluronic acid, TIMP-1<br>circulating DNA methylation of PPARg promoter                                                                                                       |
| <b>Alpha1 Antitrypsin Deficiency</b> | <b>Genetic variants of SERPINA1</b>                                                                                                            |                                                                                                            |               | Alpha1 Antitrypsin                                                                                                                                                                                                                           |
|                                      | c.187C > T<br>c.194C > T<br>c.226_228delTTC<br>c.230C > T<br>c.551_552delC<br>c.647G > T<br>c.721A > T                                         | c.739C > T<br>c.839A > T<br>c.863A > T<br>c.1096G > A<br>c.1130_1131insT<br>c.1156_1157insC<br>c.1178C > T |               |                                                                                                                                                                                                                                              |
| <b>Phenylketonuria</b>               | >950 phenylalanine hydroxylase (PAH) gene variants. Most common variants (c.1222C>T, c.1066-11G>A) (23% and 6% of all mutations, respectively) |                                                                                                            |               | phenylalanine (Phe)                                                                                                                                                                                                                          |

### Supplementary References

- 1 Soto-Gutierrez, A., Navarro-Alvarez, N. & Kobayashi, N. in *Molecular Pathology of Liver Diseases* (ed Satdarshan P. S. Monga) 17-26 (Springer US, 2011).
- 2 Locker, J. in *Molecular Pathology of Liver Diseases* (ed Satdarshan P. S. Monga) 193-211 (Springer US, 2011).
- 3 Gissen, P. & Arias, I. M. Structural and functional hepatocyte polarity and liver disease. *Journal of hepatology* **63**, 1023-1037, doi:10.1016/j.jhep.2015.06.015 (2015).
- 4 Ober, E. A. & Lemaigre, F. P. Development of the liver: Insights into organ and tissue morphogenesis. *J Hepatol* **68**, 1049-1062, doi:10.1016/j.jhep.2018.01.005 (2018).
- 5 Chiang, J. Y. L. in *Molecular Pathology of Liver Diseases* (ed Satdarshan P. S. Monga) 165-179 (Springer US, 2011).
- 6 Shetty, S., Lalor, P. F. & Adams, D. H. Liver sinusoidal endothelial cells - gatekeepers of hepatic immunity. *Nat Rev Gastroenterol Hepatol* **15**, 555-567, doi:10.1038/s41575-018-0020-y (2018).

- 7 Vernetti, L. A. *et al.* A human liver microphysiology platform for investigating physiology, drug safety, and disease models. *Experimental biology and medicine (Maywood, N.J.)* **241**, 101-114, doi:10.1177/1535370215592121 (2016).
- 8 de Raemy-Schenk, A. M. *et al.* A cellular assay for measuring the modulation of glucose production in H4IIE cells. *Assay Drug Dev Technol* **4**, 525-533, doi:10.1089/adt.2006.4.525 (2006).
- 9 Porter, W. H., Yao, H. H. & Karounos, D. G. Laboratory and clinical evaluation of assays for beta-hydroxybutyrate. *Am J Clin Pathol* **107**, 353-358, doi:10.1093/ajcp/107.3.353 (1997).
- 10 Giobbe, G. G. *et al.* Functional differentiation of human pluripotent stem cells on a chip. *Nat Methods* **12**, 637-640, doi:10.1038/nmeth.3411 (2015).
- 11 Mosoyan, G. *et al.* Imetelstat, a telomerase inhibitor, differentially affects normal and malignant megakaryopoiesis. *Leukemia* **31**, 2458 (2017).
- 12 Reinicke, M., Becker, S. & Ceglarek, U. LC-MS/MS Analysis of Triglycerides in Blood-Derived Samples. *Methods in molecular biology (Clifton, N.J.)* **1730**, 111-121, doi:10.1007/978-1-4939-7592-1\_9 (2018).
- 13 Puri, P. *et al.* The presence and severity of nonalcoholic steatohepatitis is associated with specific changes in circulating bile acids. *Hepatology (Baltimore, Md.)* **67**, 534-548, doi:10.1002/hep.29359 (2018).
- 14 Wang, R. *et al.* Exosome Adherence and Internalization by Hepatic Stellate Cells Triggers Sphingosine 1-Phosphate-dependent Migration. *J Biol Chem* **290**, 30684-30696, doi:10.1074/jbc.M115.671735 (2015).
- 15 Senutovitch, N. *et al.* Fluorescent protein biosensors applied to microphysiological systems. *Experimental biology and medicine (Maywood, N.J.)* **240**, 795-808, doi:10.1177/1535370215584934 (2015).
- 16 Tewson, P. H., Martinka, S., Shaner, N. C., Hughes, T. E. & Quinn, A. M. New DAG and cAMP Sensors Optimized for Live-Cell Assays in Automated Laboratories. *J Biomol Screen* **21**, 298-305, doi:10.1177/1087057115618608 (2016).
- 17 Cao, Y. *et al.* Interaction of FoxO1 and TSC2 induces insulin resistance through activation of the mammalian target of rapamycin/p70 S6K pathway. *J Biol Chem* **281**, 40242-40251, doi:10.1074/jbc.M608116200 (2006).
- 18 Harlen, K., Quinn, J., Hughes, T. & Quinn, A. M. *New Fluorescent Tools to Monitor Cell Stress and Toxicity* (2018).
- 19 Fosbrink, M., Aye-Han, N. N., Cheong, R., Levchenko, A. & Zhang, J. Visualization of JNK activity dynamics with a genetically encoded fluorescent biosensor. *Proc Natl Acad Sci U S A* **107**, 5459-5464, doi:10.1073/pnas.0909671107 (2010).
- 20 Lee-Montiel, F. T. *et al.* Control of oxygen tension recapitulates zone-specific functions in human liver microphysiology systems. *Experimental biology and medicine (Maywood, N.J.)* **242**, 1617-1632, doi:10.1177/1535370217703978 (2017).
- 21 Wilhelmsen, K., Farrar, K. & Hellman, J. Quantitative in vitro assay to measure neutrophil adhesion to activated primary human microvascular endothelial cells under static conditions. *J Vis Exp*, e50677, doi:10.3791/50677 (2013).
- 22 Barros, L. F. *et al.* Kinetic validation of 6-NBDG as a probe for the glucose transporter GLUT1 in astrocytes. *J Neurochem* **109 Suppl 1**, 94-100, doi:10.1111/j.1471-4159.2009.05885.x (2009).
- 23 Baba, O. Production of monoclonal antibody that recognizes glycogen and its application for immunohistochemistry. *Kokubyo Gakkai Zasshi* **60**, 264-287 (1993).
- 24 Bateman, A. Patterns of histological change in liver disease: my approach to 'medical' liver biopsy reporting. *Histopathology* **51**, 585-596 (2007).
- 25 Caldwell, S. *et al.* Hepatocellular ballooning in NASH. *J Hepatol* **53**, 719-723, doi:10.1016/j.jhep.2010.04.031 (2010).

- 26 Benedicto, A., Romayor, I. & Arteta, B. Role of liver ICAM-1 in metastasis. *Oncol Lett* **14**, 3883-3892, doi:10.3892/ol.2017.6700 (2017).
- 27 Stark, R., Grzelak, M. & Hadfield, J. RNA sequencing: the teenage years. *Nat Rev Genet* **20**, 631-656, doi:10.1038/s41576-019-0150-2 (2019).
- 28 Hoang, S. A. *et al.* Gene Expression Predicts Histological Severity and Reveals Distinct Molecular Profiles of Nonalcoholic Fatty Liver Disease. *Sci Rep* **9**, 12541, doi:10.1038/s41598-019-48746-5 (2019).
- 29 Gerhard, G. S. *et al.* Transcriptomic Profiling of Obesity-Related Nonalcoholic Steatohepatitis Reveals a Core Set of Fibrosis-Specific Genes. *Journal of the Endocrine Society* **2**, 710-726, doi:10.1210/js.2018-00122 (2018).
- 30 Kostrzewski, T. *et al.* A Microphysiological System for Studying Nonalcoholic Steatohepatitis. *Hepatology Communications* **4**, 77-91, doi:10.1002/hep4.1450 (2020).
- 31 Friedman, S. L., Neuschwander-Tetri, B. A., Rinella, M. & Sanyal, A. J. Mechanisms of NAFLD development and therapeutic strategies. *Nat Med* **24**, 908-922, doi:10.1038/s41591-018-0104-9 (2018).
- 32 Zhou, Y., Shen, J. X. & Lauschke, V. M. Comprehensive Evaluation of Organotypic and Microphysiological Liver Models for Prediction of Drug-Induced Liver Injury. *Front Pharmacol* **10**, 1093, doi:10.3389/fphar.2019.01093 (2019).
- 33 Wong, V. W., Adams, L. A., de Lédinghen, V., Wong, G. L. & Sookoian, S. Noninvasive biomarkers in NAFLD and NASH - current progress and future promise. *Nat Rev Gastroenterol Hepatol* **15**, 461-478, doi:10.1038/s41575-018-0014-9 (2018).
- 34 Greene, C. M. *et al.*  $\alpha$ 1-Antitrypsin deficiency. *Nat Rev Dis Primers* **2**, 16051, doi:10.1038/nrdp.2016.51 (2016).
- 35 Hazari, Y. M. *et al.* Alpha-1-antitrypsin deficiency: Genetic variations, clinical manifestations and therapeutic interventions. *Mutat Res* **773**, 14-25, doi:10.1016/j.mrrev.2017.03.001 (2017).
- 36 Moat, S. J. *et al.* Performance of laboratory tests used to measure blood phenylalanine for the monitoring of patients with phenylketonuria. *J Inherit Metab Dis* **43**, 179-188, doi:10.1002/jimd.12163 (2020).
- 37 Blau, N. Genetics of Phenylketonuria: Then and Now. *Hum Mutat* **37**, 508-515, doi:10.1002/humu.22980 (2016).
